# Supplementary material for: Quantification of malaria antigens PfHRP2 and pLDH by quantitative suspension array technology in whole blood, dried blood spot and plasma
Source: Springer Nature journal article supplement (doi:10.1186/s12936-019-3083-5), 2020-01-09

**A**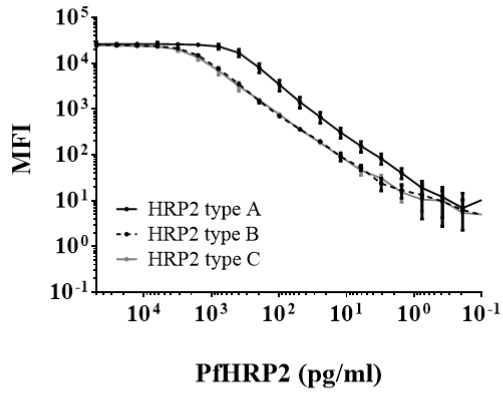**B**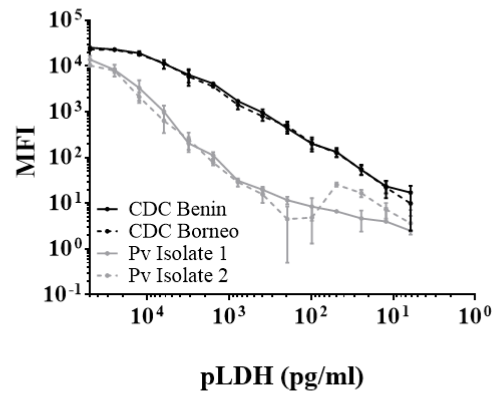**C**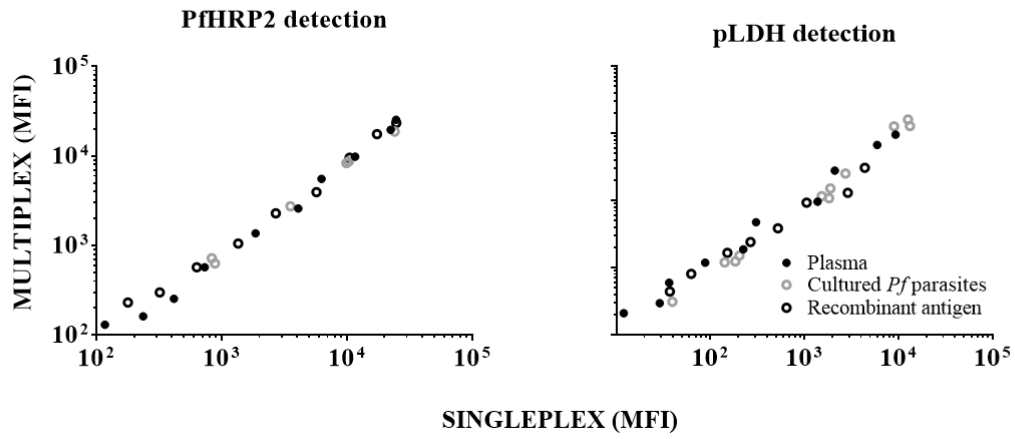

Supplement: MOESM2 [file 23188962]
